# Supplementary material for: Hollow fiber supported ionic liquid membrane microextraction for speciation of mercury by high-performance liquid chromatography-inductively coupled plasma mass spectrometry
Source: Royal Society of Chemistry journal article supplement (doi:10.1039/c4ay02408g), 2014-12-02

## Electronic supplementary information

Hollow fiber supported ionic liquid membrane microextraction for speciation of mercury by high-performance liquid chromatography-inductively coupled plasma mass spectrometry

*Zhenhua Wang*<sup>a,\*</sup>, *Qingzhong Xu*<sup>a</sup>, *Saiyu Li*<sup>a</sup>, *Lingyu Luan*<sup>a</sup>, *Jian Li*<sup>a</sup>, *Shengxiao Zhang*<sup>b</sup>, *Houhuan Dong*<sup>c</sup>

<sup>a</sup> Shandong Analysis and Tester Center, Shandong Academy of Science, Jinan, China

<sup>b</sup> College of Chemistry and Materials Science, Ludong University, Yantai, China

<sup>c</sup> Product Quality Supervising and Inspecting Institute of Taizhou city, Jiangsu, China

## Figures

**Fig. S1** The selection of carrier on the extraction enrichment factor. The concentration of dithizone, 0.02% (m/v); TOPO 2.0 % (m/v); PAN 0.005% (m/v); the sample volume, 400 mL; the ionic liquid membrane,  $[C_4MIM][PF_6]$ ; the acceptor phase,  $1\text{ g L}^{-1}$  L-cysteine solution; extraction temperature,  $50\text{ }^\circ\text{C}$ ; extraction time, 12 h.

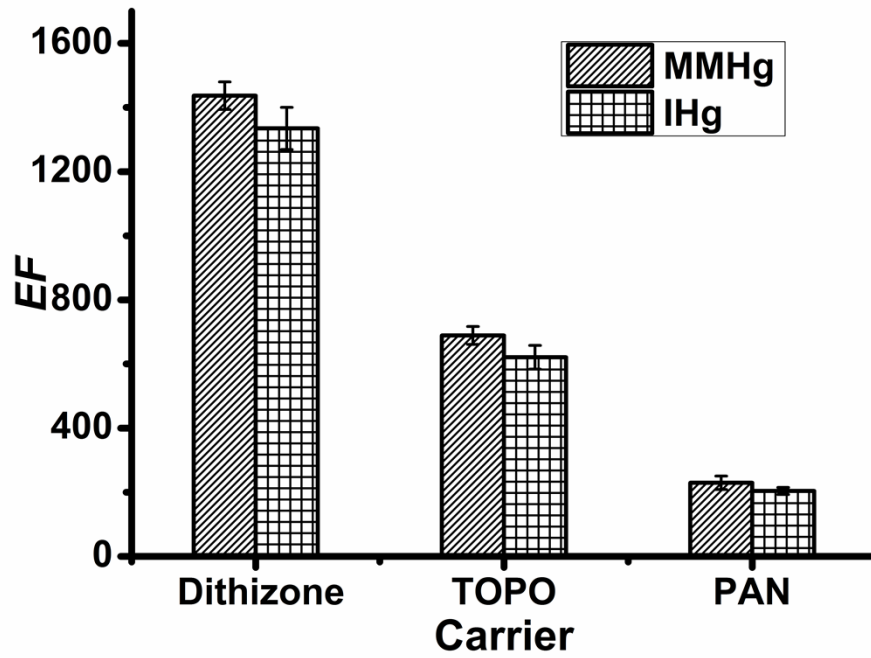

**Fig. S2** The effect of dithizone concentration on the enrichment factors. The sample volume, 400 mL; the ionic liquid membrane, [C<sub>4</sub>MIM][PF<sub>6</sub>]; the acceptor phase, 1 g L<sup>-1</sup> L-cysteine solution; extraction temperature, 50 °C; extraction time, 12 h.

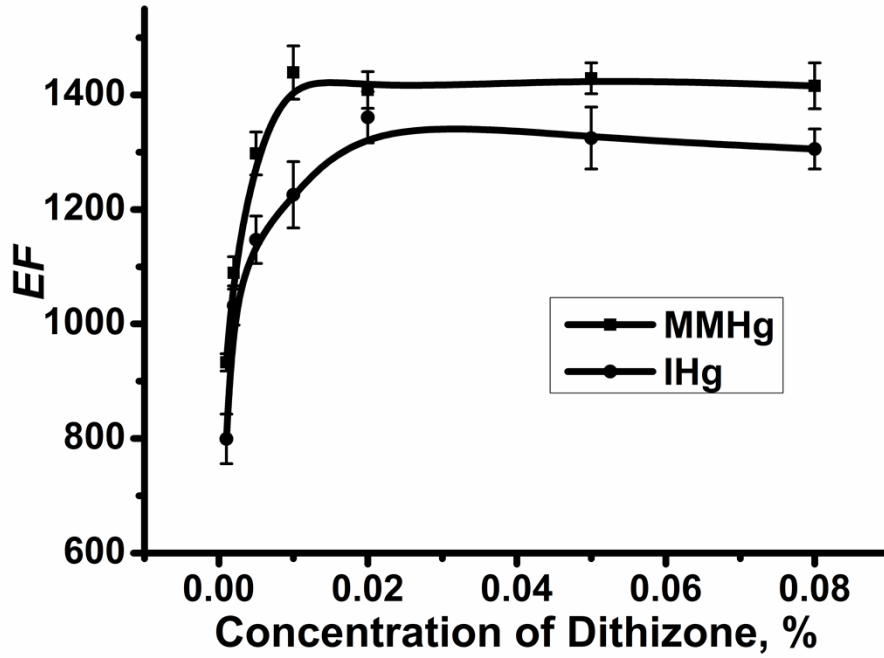

**Fig. S3** The effect of stirring rate on extraction enrichment factor. The sample volume, 400 mL; the ionic liquid membrane, [C<sub>4</sub>MIM][PF<sub>6</sub>]; the acceptor phase, 1 g L<sup>-1</sup> L-cysteine solution; extraction temperature, 50 °C; extraction time, 12 h.

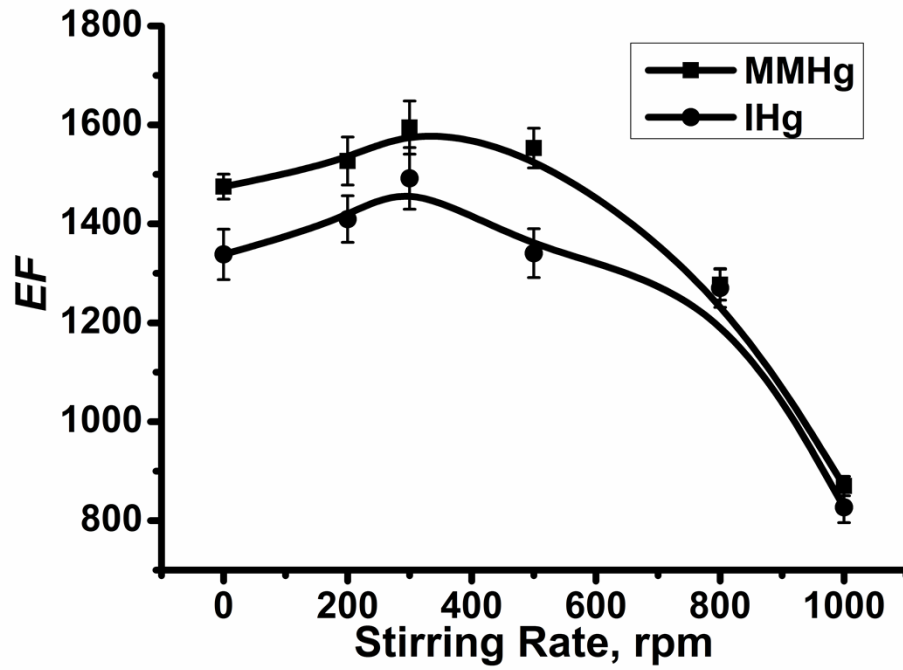

**Fig. S4** The effect of extraction time on the extraction enrichment factor. The sample volume, 400 mL; the ionic liquid membrane, [C<sub>4</sub>MIM][PF<sub>6</sub>]; the acceptor phase, 1 g L<sup>-1</sup> L-cysteine solution; extraction temperature, 50 °C.

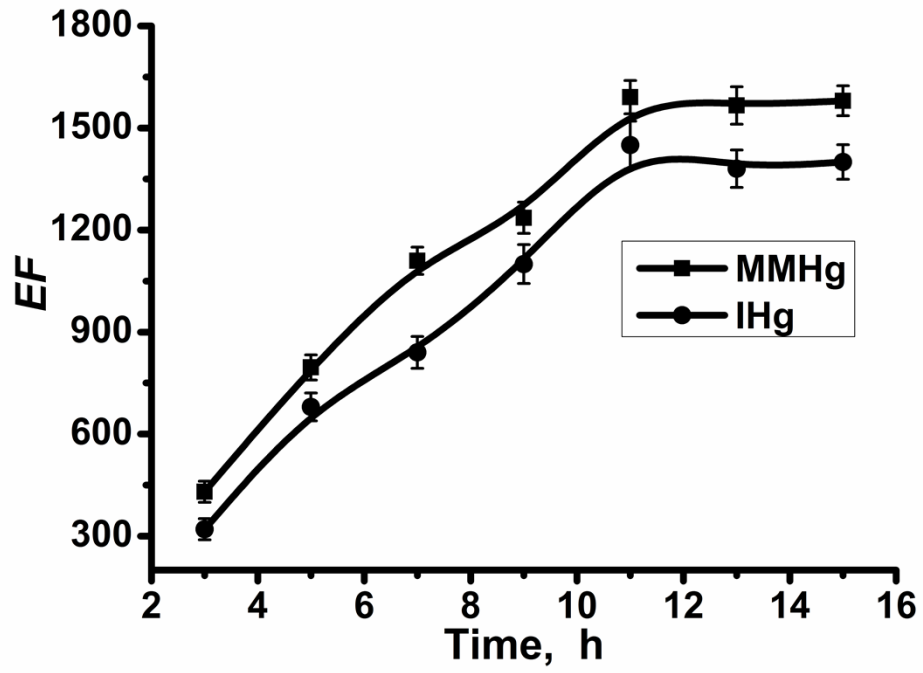

Supplement: c4ay02408g1.pdf [file c4ay02408g1.pdf]
